# Supplementary material for: Structural Basis of Ligand Selectivity by a Bacterial Adhesin Lectin Involved in Multispecies Biofilm Formation
Source: PubMed Central journal article supplement (PMC8092209; doi:10.1128/mbio.00130-21), 2021-04-06

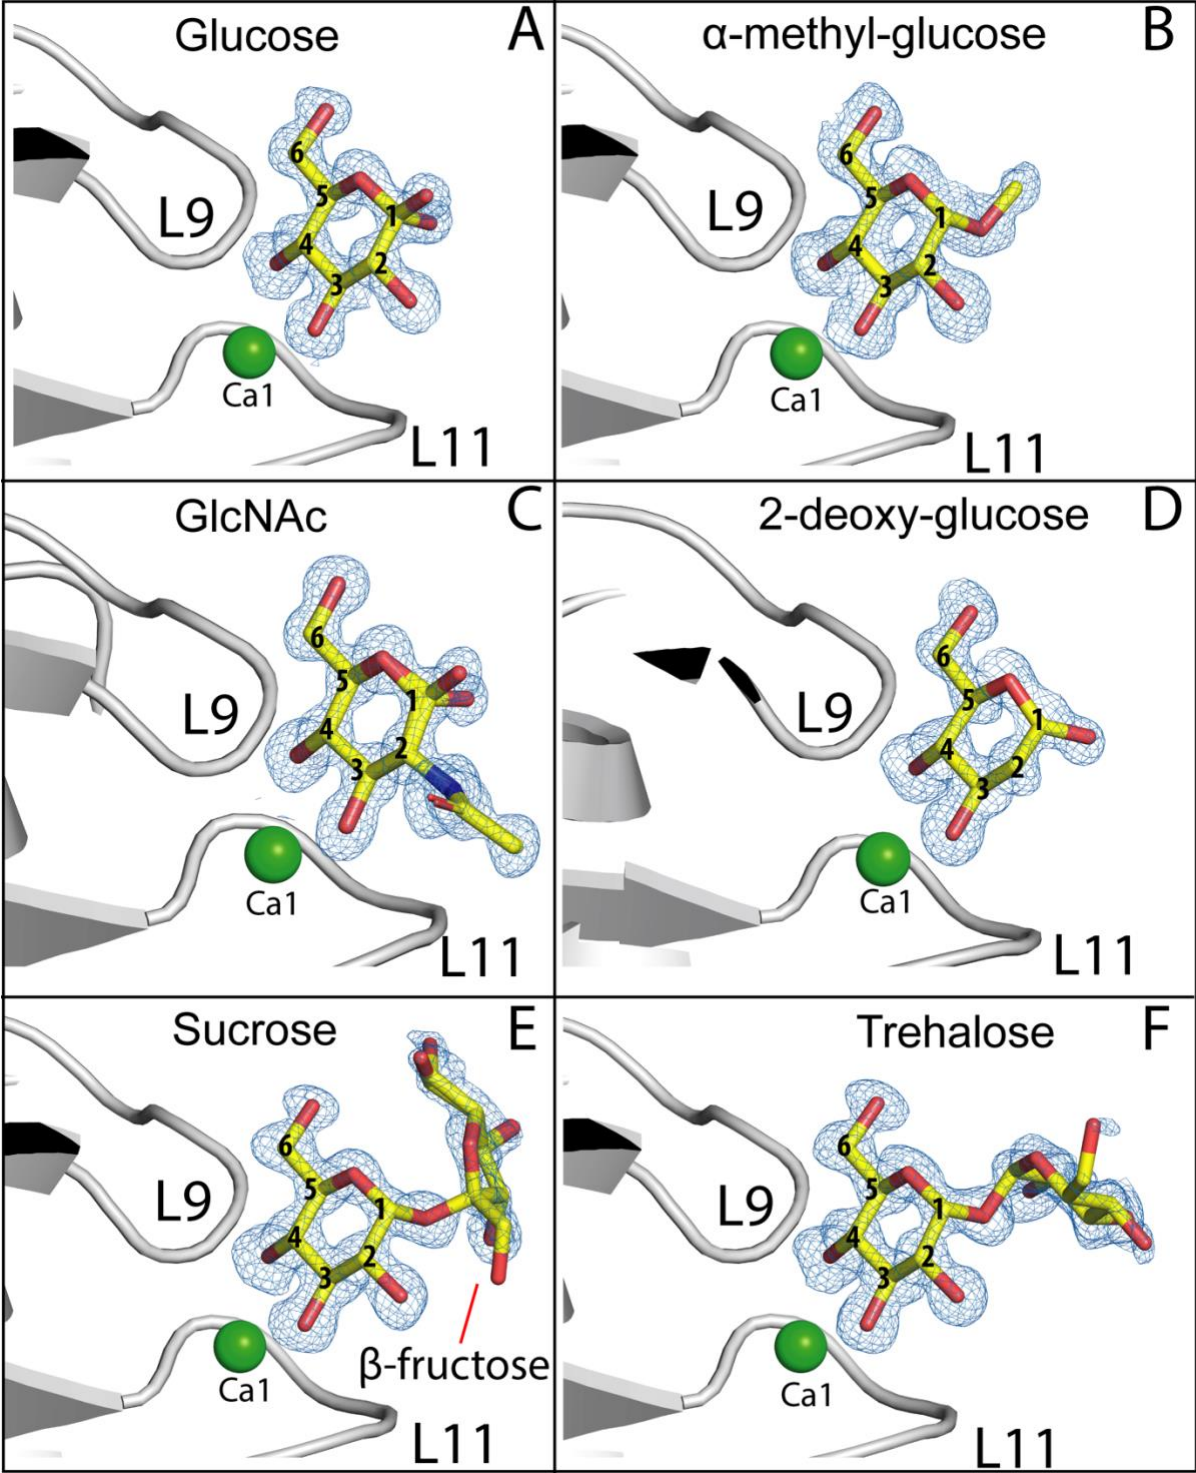

Supplement: mBio.00130-21-sf002.pdf [file mBio.00130-21-sf002.pdf]
