# Supplementary material for: Structural Basis of Ligand Selectivity by a Bacterial Adhesin Lectin Involved in Multispecies Biofilm Formation
Source: PubMed Central journal article supplement (PMC8092209; doi:10.1128/mbio.00130-21), 2021-04-06
Supplement: mBio.00130-21-sf003.pdf [file mBio.00130-21-sf003.pdf]

**A****Strong binders**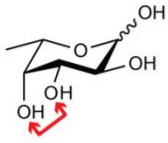

L-Fucopyranose

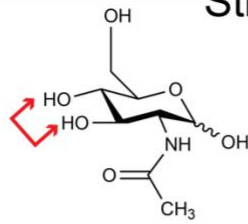

N-acetyl-Glucosamine

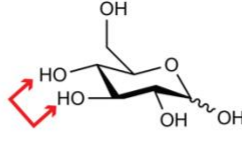

D-Glucopyranose

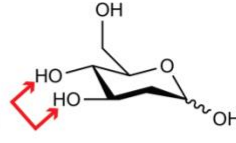

2-deoxy-D-Glucopyranose

**B****Moderate binders**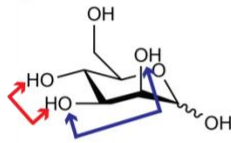

D-Mannopyranose

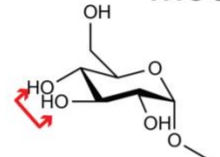Methyl- $\alpha$ -D-Glucopyranose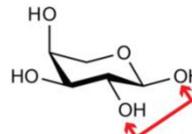 $\alpha$ -L-Arabinopyranose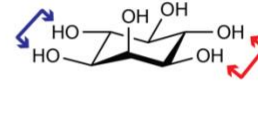*myo*-Inositol**C****Weak binders**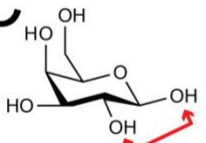 $\beta$ -D-Galactopyranose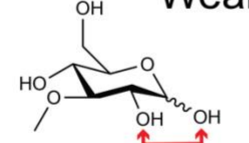 $\beta$ -3-O-methyl-Glucopyranose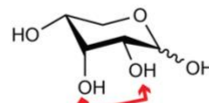

D-Ribose

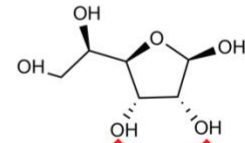 $\alpha/\beta$ -D-Allofuranose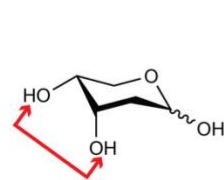

2-deoxy-D-Ribose

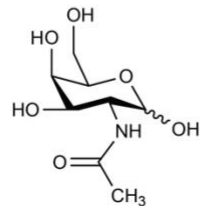

N-acetyl-Galactosamine
